# Supplementary material for: A novel route to the synthesis of bulk and well dispersed alumina-supported Ni2Mo3N catalysts via single-step hydrogen thermal treatment
Source: Royal Society of Chemistry journal article supplement (doi:10.1039/b807748g), 2008-01-01
Supplement: b807748g.pdf [file b807748g.pdf]

# A novel route to the synthesis of bulk and well dispersed alumina-supported Ni<sub>2</sub>Mo<sub>3</sub>N catalysts via single-step hydrogen thermal treatment

Zhi-Qiang Wang, Yan-Li Ma, Ming-Hui Zhang,\* Wei Li, Ke-Yi Tao

## Supplementary Information

### Synthesis of alumina supported Ni<sub>2</sub>Mo<sub>3</sub>N by the TPN method

The preparation of Ni<sub>2</sub>Mo<sub>3</sub>N/ $\gamma$ -Al<sub>2</sub>O<sub>3</sub> by the conventional temperature-programmed reduction method in NH<sub>3</sub> flow is described as follows:

The  $\gamma$ -Al<sub>2</sub>O<sub>3</sub> support was impregnated simultaneously with an aqueous solution containing Ni(CH<sub>3</sub>COO)<sub>2</sub>·6H<sub>2</sub>O and (NH<sub>4</sub>)<sub>6</sub>Mo<sub>7</sub>O<sub>24</sub>·2H<sub>2</sub>O with a molar ratio of 14:3 in 15 wt % NH<sub>3</sub>·H<sub>2</sub>O solution with stirring for 3 h. The mixture was then filtered. The solid was dried at 393 K for 3 h, and then calcined in air at 773 K for 5 h to obtain the NiO-MoO<sub>3</sub>/ $\gamma$ -Al<sub>2</sub>O<sub>3</sub> precursor for nitrides. The supported oxides precursor was then heated in a NH<sub>3</sub> flow at a mass rate of 6500 h<sup>-1</sup>. The temperature was increased linearly at a rate of 6 K/min from room temperature to 623 K, and then at a rate of 1 K/min to 923 K, finally kept at this temperature for 2 h. The product was naturally cooled to room temperature and passivated for 7 h in a flow of 1% (v/v) O<sub>2</sub>/N<sub>2</sub> to achieve 23 wt % Ni<sub>2</sub>Mo<sub>3</sub>N/ $\gamma$ -Al<sub>2</sub>O<sub>3</sub>.

**Table S1** The chemical composition of bulk  $\text{Ni}_2\text{Mo}_3\text{N}$  prepared by the hydrogen thermal method

|                                       | Ni content<br>(wt %) | Mo content<br>(wt %) | N content<br>(wt %) | Elemental<br>composition                     |
|---------------------------------------|----------------------|----------------------|---------------------|----------------------------------------------|
| Bulk $\text{Ni}_2\text{Mo}_3\text{N}$ | 26.92                | 66.85                | 2.93                | $\text{Ni}_2\text{Mo}_{3.04}\text{N}_{0.91}$ |
| Theoretical value                     | 28.00                | 68.66                | 3.34                | $\text{Ni}_2\text{Mo}_3\text{N}$             |

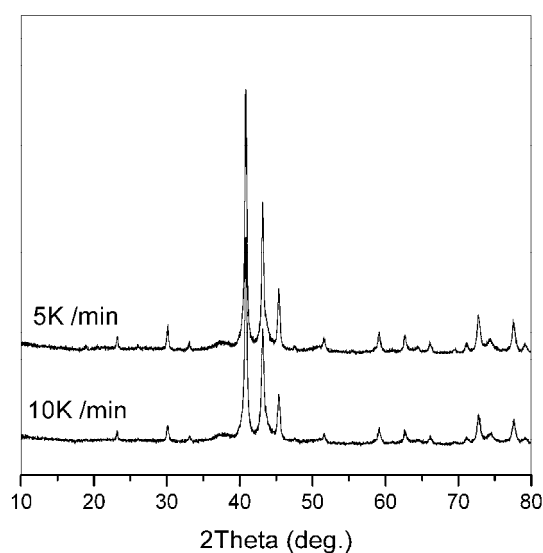

**Fig. S1.** Bulk  $\text{Ni}_2\text{Mo}_3\text{N}$  prepared with different ramp rates by the hydrogen thermal method

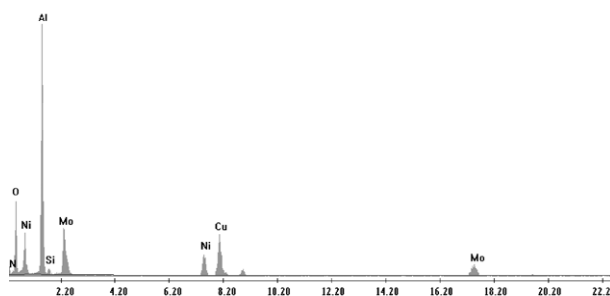

**Fig. S2.** EDX pattern of  $\text{Ni}_2\text{Mo}_3\text{N}/\text{Al}_2\text{O}_3$  prepared by the hydrogen thermal method

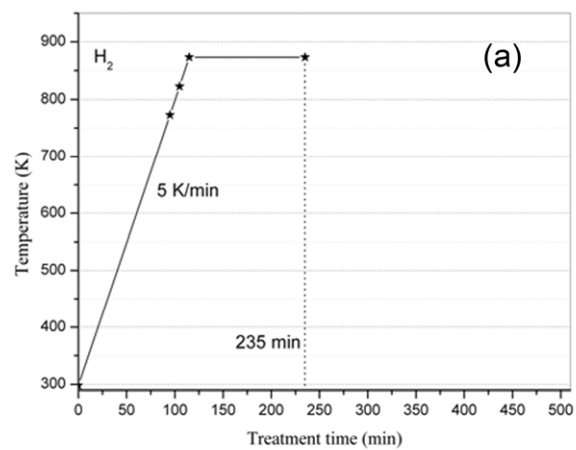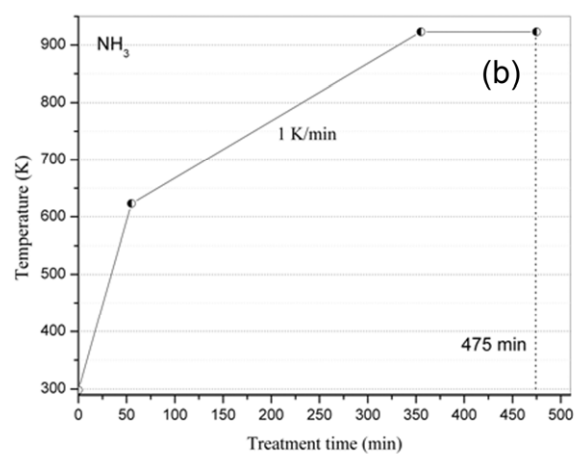

**Fig. S3** The synthesis processes of 23 wt %  $\text{Ni}_2\text{Mo}_3\text{N}$  supported on alumina prepared (a) by hydrogen thermal method and (b) by the conventional TPN method.
